1 **Rampant hybrid misexpression in craniofacial tissues within**  
2 **a recent adaptive radiation of *Cyprinodon* pupfishes**

3

4 Joseph A. McGirr<sup>1</sup>, Christopher H. Martin<sup>1</sup>,

5

6

7

8

9

10

11

12

13

14 Type: Research Article

15 <sup>1</sup>Department of Biology, University of North Carolina at Chapel Hill, 1250 South Rd., Chapel  
16 Hill, NC 27514-3280

17 Running Title: Misexpression in hybrid pupfishes

18 Keywords: RNA-seq, *cis* and *trans* regulation, F<sub>1</sub> hybrid, misexpression, trophic specialization,  
19 allele specific expression, adaptive radiation, transcriptomics

20 Correspondence: Joseph A. McGirr. Department of Biology, University of North Carolina at  
21 Chapel Hill, Genome Science 2244, 250 Bell Tower Drive., NC, 27514, USA

22 Email: [jmcgirr@email.unc.edu](mailto:jmcgirr@email.unc.edu)

23 Word count abstract: 248; Word count main text: 6,994; Tables: 2; Figures: 6

24 **Abstract**

25 Genetic incompatibilities constitute the final stages of reproductive isolation and speciation, but  
26 little is known about incompatibilities that occur within recent adaptive radiations among closely  
27 related diverging populations. Crossing divergent species to form hybrids can break up  
28 coadapted variation, resulting in genetic incompatibilities within developmental networks  
29 shaping adaptive traits. We crossed two closely related sympatric *Cyprinodon* pupfish species – a  
30 dietary generalist and a specialized molluscivore – and measured expression levels in their F<sub>1</sub>  
31 hybrids to identify regulatory variation underlying the novel craniofacial morphology found in  
32 this recent microendemic adaptive radiation. We extracted mRNA from eight day old whole-  
33 larvae tissue and from craniofacial tissues dissected from 17-20 day old larvae to compare gene  
34 expression between a total of seven F<sub>1</sub> hybrids and 24 individuals from parental species  
35 populations. We found 3.9% of genes differentially expressed between generalists and  
36 molluscivores in whole-larvae tissues and 0.6% of genes differentially expressed in craniofacial  
37 tissue. We found that only 2.1% of genes were misexpressed in whole-larvae hybrids at 8 dpf  
38 whereas 19.1% of genes were misexpressed in hybrid craniofacial tissue at 17-20 dpf, after  
39 correcting for potential sequencing biases. We also measured allele specific expression across  
40 15,429 phased heterozygous sites to identify regulatory mechanisms underlying differential  
41 expression between generalists and molluscivores. Together, our results highlight the importance  
42 of considering misexpression as an early indicator of genetic incompatibilities in the context of  
43 rapidly diverged morphology and suggests that wide-spread compensatory regulatory divergence  
44 drives hybrid misexpression in developing tissues that give rise to novel craniofacial traits.

45

46

47

48

49

50

51

## 52 **Introduction**

53 Changes in gene expression are an important source of variation in adaptive morphological traits  
54 (Carroll 2008; Wolf et al. 2010; Indjeian et al. 2016). As genetic variation accumulates in  
55 regulatory and coding sequences, stabilizing selection on gene expression results in coevolution  
56 such that molecular functions are largely maintained (Coolon et al. 2014; Hodgins-Davis et al.  
57 2015). Crossing divergent species to form F<sub>1</sub> hybrids can break up such coadapted variation,  
58 resulting in genetic incompatibilities within developing tissues that give rise to adaptive traits  
59 (Michalak and Noor 2004; Landry et al. 2007; Mack and Nachman 2017). Genetic  
60 incompatibilities that reduce hybrid fitness can drive reproductive isolation either intrinsically –  
61 causing sterility or increased embryonic mortality – or extrinsically whereby incompatibilities  
62 reduce hybrid performance in a particular environment (Schluter 2000, Coyne and Orr 2004).

63 Of particular importance to the process of speciation are genetic incompatibilities caused  
64 by hybrid misexpression – when gene expression levels in hybrids are transgressive and fall  
65 outside of the range of expression variation observed in both parental species (Michalak and  
66 Noor 2004; Ranz et al. 2004; Haerty and Singh 2006; Rockman and Kruglyak 2006; Malone and  
67 Michalak 2008; Renaut et al. 2009). This pattern of expression causes Dobzhansky-Muller  
68 incompatibilities (DMIs) if incompatible alleles in hybrids cause misexpression that results in  
69 reduced hybrid fitness and thus increased post-zygotic reproductive isolation (Presgraves 2003;  
70 Coyne 2004; Sweigart et al. 2006; Ortíz-Barrientos et al. 2007; Malone and Michalak 2008;  
71 Renaut et al. 2009; Davidson and Balakrishnan 2016). Laboratory studies searching for genes  
72 that cause DMIs often search for genes causing sterility or embryonic lethality in hybrids. This  
73 approach ignores the fitness consequences of misexpression occurring at later developmental  
74 stages within diverse tissue types, thus underestimating the actual number of genetic  
75 incompatibilities distinguishing species (Fang et al. 2012; Schumer et al. 2014). Combining  
76 findings from these studies with analyses of hybrid misexpression in tissues that give rise to  
77 adaptive morphological traits can reveal a broader view of incompatibilities that arise during  
78 speciation.

79 Measuring gene expression in hybrids can also implicate regulatory mechanisms  
80 underlying expression divergence between parental species, which is important for  
81 understanding how expression levels are inherited and how they shape adaptive traits (Wittkopp

82 et al. 2004; McManus et al. 2010; Mack and Nachman 2017). Research on hybrid gene  
83 expression thus far has shown mixed results regarding patterns of inheritance (Signor and  
84 Nuzhdin 2018). Some studies found evidence for ubiquitous transgressive expression inherited in  
85 F<sub>1</sub> hybrids (i.e. over- or under-dominance) (Ranz et al. 2004; Rockman and Kruglyak 2006;  
86 Roberge et al. 2008), while others found predominately additive patterns (Hughes et al. 2006;  
87 Rottschmidt and Harr 2007; Davidson and Balakrishnan 2016). Mechanisms of gene expression  
88 divergence in F<sub>1</sub> hybrids are characterized as interactions between *cis*-regulatory elements and  
89 *trans*-regulatory factors. *Cis* elements are often non-coding regions of DNA proximal to genes  
90 that are bound by *trans*-acting proteins and RNAs to regulate mRNA abundance. It is possible to  
91 identify mechanisms of gene expression divergence between parental species by bringing *cis*  
92 elements from both parents together in the same *trans* environment in F<sub>1</sub> hybrids and quantifying  
93 allele specific expression (ASE) of parental alleles at heterozygous sites (Cowles et al. 2002;  
94 Wittkopp et al. 2004). Some emerging principles of regulatory evolution suggest that *cis*-variants  
95 contribute more to interspecific divergence and show mostly additive inheritance, while *trans*-  
96 variants are often more pleiotropic, contribute more to intraspecific divergence, and show  
97 predominately recessive inheritance (Prud'homme et al. 2007; Lemos et al. 2008; Signor and  
98 Nuzhdin 2018). Finally, *cis* and *trans* regulatory variants can compensate for one another if  
99 stabilizing selection favors an optimal level of gene expression. Hybrid misexpression is  
100 expected when different compensatory variants have accumulated in diverging lineages. (Denver  
101 et al. 2005; Landry et al. 2005; Bedford and Hartl 2009; Goncalves et al. 2012).

102 Here we investigate F<sub>1</sub> hybrids from crosses between two closely related species of  
103 *Cyprinodon* pupfishes to understand regulatory mechanisms that led to the evolution of novel  
104 craniofacial adaptations in this group (Fig 1A). *Cyprinodon brontotheroides* – hereafter referred  
105 to as the molluscivore – is a trophic specialist species endemic to San Salvador Island, Bahamas  
106 that has adapted to eat hard shelled prey including mollusks and ostracods (Martin and  
107 Wainwright 2013a,c). This species likely diverged from a generalist common ancestor within the  
108 past 10,000 years to occupy this novel niche (Mylroie, J.E, Hagey 1995; Holtmeier 2001; Turner  
109 et al. 2008; Martin and Wainwright 2011; Martin 2016). Adapting to this niche involved extreme  
110 morphological divergence in craniofacial traits compared to its sympatric generalist sister species  
111 *Cyprinodon variegatus* (Martin and Wainwright 2013c; Lencer et al. 2016). This species  
112 consumes mainly algae and detritus and is hereafter referred to as the ‘generalist.’ Almost all

113 other Caribbean pupfish species are generalists, with the exception of a novel scale-eating  
114 pupfish that is also a member of the San Salvador pupfish radiation (Martin and Wainwright  
115 2011, 2013c) and a second sympatric radiation of trophic specialists in Laguna Chichancanab,  
116 Mexico (Humphries and Miller 1981; Strecker 2006). Molluscivores exhibit a novel skeletal  
117 protrusion on the anteriodorsal head of the maxilla not found in generalist populations that may  
118 be used to stabilize prey items held within its oral jaws, which are shorter and more robust  
119 relative to generalist species (Fig 1A). This jaw morphology provides higher mechanical  
120 advantage for crushing mollusks and other hard-shelled prey (Wainwright and Richard 1995;  
121 Martin and Wainwright 2011).

122 Molluscivores and generalists readily hybridize in the laboratory to produce fertile  $F_1$   
123 offspring with intermediate craniofacial morphologies and no obvious sex ratio distortion  
124 (Martin and Wainwright 2011, 2013b; Martin and Feinstein 2014). These species remain largely  
125 reproductively isolated in sympatry across multiple lake populations (genome-wide average  $F_{st} =$   
126 0.08; (Martin and Feinstein 2014; West and Kodric-Brown 2015; McGirr and Martin 2017).  
127 Therefore, unlike most studies of hybrid misexpression, we are not solely concerned with  
128 identifying gene expression patterns underlying hybrid sterility or lethality. Rather, we also aim  
129 to characterize misexpression in a developing tissue that gives rise to novel craniofacial  
130 phenotypes within a young species pair with ongoing gene flow. We dissected craniofacial tissue  
131 from 17-20 day old  $F_1$  hybrids and extracted total mRNA to quantify gene expression levels. We  
132 also extracted whole-larvae mRNA from 8 day old generalists, molluscivores, and their hybrids.  
133 We found misexpression in hybrids at both stages, with more extensive misexpression in hybrid  
134 craniofacial tissues. Finally, we quantified allele specific expression (ASE) across exome-wide  
135 phased heterozygous sites to uncover mechanisms of regulatory divergence and found evidence  
136 for *cis* and *trans*-variants controlling patterns of differential expression between generalists and  
137 molluscivores, and compensatory variation influencing patterns of hybrid misexpression.

138

## 139 **Materials and Methods**

### 140 *Study system and sample collection*

141 Our methods for raising larvae and extracting RNA were identical to previously outlined  
142 methods (McGirr and Martin 2018). We collected fishes for breeding from three hypersaline  
143 lakes on San Salvador Island, Bahamas (Little Lake, Osprey Lake, and Crescent Pond) using a  
144 hand net or seine net between 2011 and 2017. These fishes were reared at 25–27°C, 10–15 ppt  
145 salinity, pH 8.3, and fed a mix of commercial pellet foods and frozen foods. All lab bred larvae  
146 were raised exclusively on newly hatched brine shrimp after hatching and before euthanasia.  
147 Individuals were euthanized in an overdose of buffered MS-222 and stored in RNA later  
148 (Ambion, Inc.) at - 20°C for up to 18 months. We used RNeasy Mini Kits (Qiagen catalog  
149 #74104) to extract RNA from all samples.

150 We previously generated 24 transcriptomes belonging to generalists and molluscivores  
151 collected at two early developmental stages: 8-10 days post fertilization and 17-20 dpf (McGirr  
152 and Martin 2018). RNA was extracted from whole-larvae tissue at 8-10 dpf. We dissected all 17-  
153 20 dpf samples to extract RNA from anterior craniofacial tissues containing the dentary, angular,  
154 articular, maxilla, premaxilla, palatine, and associated craniofacial connective tissues (Fig. S1).  
155 Dissections were performed using fine-tipped tweezers washed with RNase AWAY (Molecular  
156 BioProducts). These 24 samples were generated by breeding populations of lab-raised fishes that  
157 resulted from either one or two generations of full-sib breeding between wild caught fishes from  
158 Little Lake and Crescent Pond on San Salvador Island, Bahamas (Table 1). There was variation  
159 in sampling time because eggs were fertilized naturally within breeding tanks and collected on  
160 the same day or subsequent day following egg laying. We collected larvae in a haphazard  
161 manner over multiple spawning intervals and it is unlikely that sampling time varied consistently  
162 by species.

163 Here we analyze an additional 19 transcriptomes from generalists, molluscivores, and  
164 their hybrids (Table 1). First, we crossed a generalist female with a molluscivore male to  
165 generate four F<sub>1</sub> hybrids that were collected at 17-20 dpf and extracted RNA from dissected  
166 craniofacial tissues. A lab-reared female generalist was used to generate hybrids that was derived  
167 from wild caught generalists from Little Lake following one generation of full-sib mating. A lab-  
168 reared male molluscivore was used to generate hybrids that was derived from wild caught  
169 molluscivores from Little Lake following two generations of full-sib mating.

170 We performed separate crosses to collect larvae at exactly 8 dpf (190-194 hours after  
171 fertilization rather than 8-10 days). We crossed a generalist female with a molluscivore male to  
172 generate three F<sub>1</sub> hybrids for whole-larvae RNA extractions. The parents of these hybrids were  
173 wild-caught from Osprey Lake. Finally, we extracted whole-larvae RNA from six generalists and  
174 six molluscivores collected at 8 dpf. These samples were generated from wild-caught individuals  
175 from Osprey Lake and Crescent Pond. In total, we analyzed transcriptomes from 43 individuals  
176 that involved four separate rounds of sequencing (Table 1 and S1).

177

### 178 ***RNA sequencing and alignment***

179 The previously reported 24 transcriptomes were sequenced at the High Throughput Genomic  
180 Sequencing Facility at UNC Chapel Hill in April 2017 (McGirr and Martin 2018). The 24  
181 libraries were prepared at the facility using the KAPA stranded mRNA-seq kit (KAPA  
182 Biosystems 2016) followed by sequencing on one lane of Illumina 150 paired-end Hiseq4000  
183 (Table 1 and 2).

184 19 additional transcriptomes were sequenced at The Vincent J. Coates Genomics  
185 Sequencing Laboratory at the University of California, Berkeley. All 19 libraries were prepared  
186 at the facility using the Illumina stranded Truseq RNA kit (Illumina RS-122-2001) and all  
187 sequencing was performed on Illumina 150 paired-end Hiseq4000. Four libraries for RNA  
188 extracted from 17-20 dpf hybrid craniofacial tissues were pooled on a single lane and sequenced  
189 in June 2017. 15 libraries for whole-larvae RNA samples collected at exactly 8 dpf were pooled  
190 across one and three lanes and sequenced in May (n = 9) and July (n = 6) 2018, respectively  
191 (Table 1 and S1).

192 We filtered all raw reads using Trim Galore (v. 4.4, Babraham Bioinformatics) to remove  
193 Illumina adaptors and low-quality reads (mean Phred score < 20) and mapped filtered reads to  
194 the scaffolds of the *Cyprinodon* reference genome (NCBI, *C. variegatus* annotation release 100,  
195 total sequence length = 1,035,184,475; number of scaffolds = 9259, scaffold N50 = 835,301;  
196 contig N50 = 20,803; (Lencer et al. 2017)) using the RNA-seq aligner STAR with default  
197 parameters (v. 2.5 (Dobin et al. 2013)). We used the featureCounts function of the Rsubread  
198 package (Liao et al. 2014) requiring paired-end and reverse stranded options to generate read

199 counts across 24,952 previously annotated features (Lencer et al. 2017) with an average coverage  
200 depth of 136 reads (Table S2 and S3). We assessed mapping and count quality using MultiQC  
201 (Ewels et al. 2016). We previously showed that there was no difference between generalists and  
202 molluscivores in the proportion of reads that map to annotated features of the *Cyprinodon*  
203 reference genome (McGirr and Martin 2018). Similarly, here we found no difference in the  
204 proportion of reads mapping to features between generalists, molluscivores, and hybrids (Fig.  
205 S2; ANOVA,  $P = 0.6$ ), but we did find that fewer reads mapped to features in 17-20 dpf samples  
206 than 8 dpf samples (ANOVA,  $P = 2.38 \times 10^{-10}$ ).

207         Since we analyzed RNA from 43 individuals that were sequenced across four different  
208 dates and their libraries were prepared with either KAPA or TruSeq stranded mRNA-seq kits, we  
209 tested whether a significant amount of between-sample variance in read counts was explained by  
210 sequencing date or library preparation kit. We fit linear models (using the `lm()` function in R) to  
211 determine whether normalized counts across individuals were influenced by 1) the number of  
212 PCR duplicate reads produced during sequence amplification, 2) the uniformity of coverage  
213 across a transcript, or 3) the depth of coverage across GC-rich transcripts. All of these measures  
214 could have been influenced by different library preparation methods (Alberti et al. 2014; Van  
215 Dijk et al. 2014; KAPA Biosystems 2016). We quantified the number of duplicate reads and the  
216 median percent GC content of mapped reads for each sample using RSeQC (Wang et al. 2012).  
217 We also used RSeQC to estimate transcript integrity numbers (TINs) which is a measure of  
218 potential *in vitro* RNA degradation within a sample. TIN is calculated by analyzing the  
219 uniformity of coverage across transcripts. (Wang et al. 2012, 2016). We performed ANOVA to  
220 determine whether the proportion of duplicate reads, GC content of reads, TINs, the number of  
221 normalized read counts, number of raw read counts, or number of raw fastq reads differed  
222 between samples grouped by library preparation method and by sequencing date.

223

## 224 ***Differential expression analyses and hybrid inheritance of expression patterns***

225 We performed differential expression analyses with DESeq2 (v. 3.5 (Love et al. 2014)). This  
226 program fits negative binomial generalized linear models for each gene across samples to test the  
227 null hypothesis that the fold change in gene expression between two groups is zero. DESeq2 uses  
228 an empirical Bayes shrinkage method to determine gene dispersion parameters, which models



229 within-group variability in gene expression, and logarithmic fold changes in gene expression.  
230 DESeq2 normalizes raw read counts by calculating a geometric mean of counts for each gene  
231 across samples, dividing individual gene counts by this mean, and using the median of these  
232 ratios as a size factor for each sample. These sample-specific size factors account for differences  
233 in library size and sequencing depth between samples. Gene features showing less than 10  
234 normalized counts in every sample in each comparison were discarded from analyses.  
235 Differential expression between groups was determined with Wald tests by comparing  
236 normalized posterior log fold change estimates and correcting for multiple testing using the  
237 Benjamini–Hochberg procedure with a false discovery rate of 0.05 (Benjamini and Hochberg  
238 1995). We also used DESeq2 to perform clustering and principal component analyses (Fig. S3).

239 We conducted pairwise comparisons to identify genes differentially expressed between  
240 hybrids vs. parental species, hybrids vs. generalists, hybrids vs. molluscivores, and generalists  
241 vs. molluscivores. “Parental species” refers to generalists and molluscivores derived from the  
242 same populations as the parents of the hybrid samples. We did not sequence any of the parents  
243 crossed to generate hybrids. We defined genes as misexpressed in hybrids if they were  
244 significantly differentially expressed between hybrids and the parental species samples. First, we  
245 compared whole-larvae gene expression between samples collected at 8 dpf (six generalists, six  
246 molluscivores, and three hybrids). All of the 8 dpf samples were sequenced at the Vincent J.  
247 Coates Genomic Sequencing Laboratory, University of California Berkeley (VJCGSL UCB) and  
248 their libraries were all prepared using the TruSeq stranded mRNA-seq kit. Second, we compared  
249 craniofacial tissue gene expression between samples collected at 17-20 dpf (six generalists, six  
250 molluscivores, and four hybrids). The generalist and molluscivore samples were sequenced at the  
251 High-Throughput Sequencing Facility, University of North Carolina Chapel Hill (HTSF UNC)  
252 and their libraries were prepared using the KAPA stranded mRNA-seq kit, while the hybrids  
253 were sequenced at the VJCGSL UCB and their libraries were prepared using the TruSeq kit. In  
254 order to understand how sequencing at different facilities and using different library prep  
255 methods affected the proportion of genes misexpressed between hybrids and parental species at  
256 17-20 dpf, we performed a third set of comparisons between hybrids collected at 8 dpf  
257 (sequenced at VJCGSL UCB with TruSeq) and generalists and molluscivores from a previous  
258 study collected at 8-10 dpf (sequenced at HTSF UNC with KAPA; (McGirr and Martin 2018)).  
259 We measured how many genes were differentially expressed between 8 dpf hybrids vs. 8-10 dpf

260 parental species than there were differentially expressed between 8 dpf hybrids vs. 8 dpf parental  
261 species. This allowed us to estimate an upper-limit on the proportion of genes falsely identified  
262 as differentially expressed between 17-20 dpf hybrids and 17-20 dpf parental species due to  
263 samples being sequenced at different facilities with different library preparation kits.

264 To determine whether genes showed additive, dominant, or transgressive patterns of  
265 inheritance, we quantified differences in gene expression between hybrids vs. parental species  
266 and compared them to genes differentially expressed between generalists vs. molluscivores (Fig.  
267 2). Hybrid inheritance was considered additive if hybrid gene expression was intermediate  
268 between generalists and molluscivores with significant differential expression between  
269 generalists and molluscivores, respectively. Inheritance was dominant if hybrid expression was  
270 significantly different from one parent species but not the other. Genes showing misexpression in  
271 hybrids showed transgressive inheritance, meaning hybrid gene expression was significantly  
272 higher (overdominant) or lower (underdominant) than both parental species.

273

#### 274 ***Gene ontology enrichment analyses***

275 The *Cyprinodon* reference genome is annotated for genomic features (NCBI, *C. variegatus*  
276 Annotation Release 100, (Lencer et al. 2017)), and many annotated genes share the same name  
277 as their zebrafish orthologs. We performed gene ontology (GO) enrichment analyses for genes  
278 differentially expressed between species and misexpressed in hybrids that shared the same name  
279 as zebrafish orthologs using GO Consortium resources available at [geneontology.org](http://geneontology.org) (Ashburner  
280 et al. 2000; GO Consortium 2017). We searched for enrichment across biological process  
281 ontologies curated for zebrafish.

282

#### 283 ***Allele specific expression and mechanisms of regulatory divergence***

284 We partitioned hybrid gene expression divergence into patterns that could be attributed to *cis*-  
285 regulatory variation in cases where linked genetic variation within proximal non-coding DNA  
286 affected expression levels, and *trans*-regulatory variation in cases where genetic variation in  
287 factors bound to *cis*-regulatory elements affected expression levels. We also identified genes

288 showing compensatory regulatory divergence, where *cis* and *trans* regulatory variants interact  
289 resulting in similar levels of gene expression between species but biased allelic expression in  
290 hybrids (Wittkopp et al. 2004; Landry et al. 2005; McManus et al. 2010).

291 We followed the best practices guide recommended by the Genome Analysis Toolkit  
292 (DePristo et al. 2011 (v. 3.5)) in order to call and refine SNP variants within coding gene regions  
293 using the Haplotype Caller function. We called SNPs across all filtered reads mapped to  
294 annotated features for 17-20 dpf samples and 8 dpf samples using conservative hard-filtering  
295 parameters (DePristo et al. 2011; Marsden et al. 2014): Phred-scaled variant confidence divided  
296 by the depth of nonreference samples  $> 2.0$ , Phred-scaled *P*-value using Fisher's exact test to  
297 detect strand bias  $> 60$ , Mann–Whitney rank-sum test for mapping qualities ( $z > 12.5$ ), Mann–  
298 Whitney rank-sum test for distance from the end of a read for those with the alternate allele  
299 ( $z > 8.0$ ). We used the ReadBackedPhasing function with a phase quality threshold  $> 20$  to  
300 identify phased variants. We used the VariantsToTable function (with genotypeFilterExpression  
301 "isHet == 1") to output phased heterozygous variants for each individual. We counted the  
302 number of reads covering heterozygous sites using the ASEReadCounter (with -U  
303 ALLOW\_N\_CIGAR\_READS -minDepth 20 --minMappingQuality 10 --minBaseQuality 20 -drf  
304 DuplicateRead). In total we identified 15,429 phased heterozygous sites across 32 individuals  
305 with sequencing coverage  $\geq 20\times$  that fell within 3,974 genes used for differential expression  
306 analyses.

307 We assigned each heterozygous allele as the reference allele, alternate allele, or second  
308 alternate allele and matched each allele to its corresponding read depth. This allowed us to  
309 identify allele specific expression (ASE) by measuring expression variation between the two  
310 haplotypes of each gene distinguished by heterozygous sites. We used a binomial test in R  
311 (binom.test) to determine if a heterozygous site showed significantly biased expression of one  
312 allele over another ( $P < 0.05$ ; McManus et al. 2010; Mack and Nachman 2016). We measured  
313 ASE across 3,974 genes expressed in parental species and hybrids. A gene was considered to  
314 show ASE in hybrids if a phased heterozygous allele within that gene showed consistent biased  
315 expression in all hybrid samples (17-20 dpf  $n = 4$ ; 8 dpf  $n = 3$ ) and did not show ASE in any of  
316 the parental samples ( $n = 12$  for both developmental stages).

317 We combined information from differential expression analyses and ASE analyses to  
318 determine mechanisms of regulatory divergence between species (Table 2). A gene showing  
319 allele specific expression in F<sub>1</sub> hybrids that is differentially expressed between parental species is  
320 expected to result from *cis*-regulatory divergence (Wittkopp et al. 2004). We identified  
321 expression divergence due to *cis*-regulation if genes showed significant differential expression  
322 between generalists and molluscivores, significant ASE in hybrids, and did not show ASE in  
323 generalists or molluscivores. *Trans*-regulatory divergence can be determined by comparing the  
324 ratio of gene expression in parents with the ratio of allelic expression in F<sub>1</sub> hybrids (Wittkopp et  
325 al. 2004). We identified expression divergence due to *trans*-regulation if genes did not show  
326 ASE in hybrids but were differentially expressed between generalists and molluscivores. Gene  
327 expression controlled by compensatory variation in parental species is often associated with  
328 misexpression in their hybrids (Landry et al. 2005, 2007; Goncalves et al. 2012). We identified  
329 gene expression controlled by compensatory regulatory variation if a gene did not show  
330 differential expression between generalists and molluscivores, showed significant ASE in  
331 hybrids, and did not show ASE in generalists or molluscivores.

332

## 333 **Results**

### 334 *Differential expression between generalists and molluscivores*

335 We previously found 1,014 genes differentially expressed in whole-larvae tissue between six  
336 generalists and six molluscivores collected at 8-10 dpf (McGirr and Martin 2018). Here we  
337 compared gene expression in whole-larvae tissue collected at exactly 8 dpf (190-194 hours after  
338 fertilization rather than 8-10 dpf) between six generalists and six molluscivores. We found 700  
339 out of 17,723 (3.9%) genes differentially expressed between species (Fig 1C). 235 of the 700  
340 genes were annotated as zebrafish orthologs and used for gene ontology enrichment analyses.  
341 Encouragingly, the only significantly overrepresented ontology was skeletal system  
342 morphogenesis (GO:0048705) which matched 11 differentially expressed genes (Table S4).

343 We previously found 120 genes differentially expressed in craniofacial tissue between  
344 species at 17-20 dpf (McGirr and Martin 2018). Here we reexamined gene expression in those  
345 same individuals using a more conservative threshold for genes to be included in differential

346 expression analyses (where a gene must show  $\geq 10$  normalized counts in every sample included  
347 in the comparison). As expected, we found fewer genes differentially expressed using this more  
348 conservative threshold (81 out of 13,901 (0.6%); Fig 1E). These 81 genes did not show  
349 enrichment for any biological process ontologies.

350

### 351 *Hybrid misexpression in whole-larvae tissue*

352 We compared gene expression in whole-larvae tissue collected at 8 dpf from generalist and  
353 molluscivore populations ( $n = 12$ ) with expression in their F<sub>1</sub> hybrids ( $n = 3$ ) and found that 370  
354 out of 17,705 genes (2.1%) were misexpressed in hybrids (Fig. 1D). Slightly more genes showed  
355 underdominant inheritance (209; 1.2%) than overdominant inheritance (154; 0.89%; Fig. 3A and  
356 C). The magnitude of differential expression was higher for genes showing underdominant  
357 inheritance than overdominant inheritance (Fig. S4; Wilcoxon rank sum test,  $P = 8.5 \times 10^{-5}$ ). Of  
358 the 370 genes showing misexpression, 138 were annotated as zebrafish orthologs used for gene  
359 ontology enrichment analyses. The only significantly overrepresented term was cellular lipid  
360 metabolic process (GO:0044255).

361 The majority of genes showed conserved levels of expression with no significant  
362 difference between hybrids and parental species (84.9%). In line with other hybrid expression  
363 studies (Hughes et al. 2006; Rottschmidt and Harr 2007; Davidson and Balakrishnan 2016), most  
364 genes that did not show conserved inheritance showed additive inheritance (399; 2.3%). We  
365 found some genes showing evidence for dominance, with 89 (0.51%) showing ‘generalist-like’  
366 expression patterns and 168 (0.97%) showing ‘molluscivore-like’ patterns of inheritance (Fig 3A  
367 and C).

368

### 369 *Hybrid misexpression in craniofacial tissue*

370 We compared gene expression in craniofacial tissue collected at 17-20 dpf from generalist and  
371 molluscivore populations ( $n = 12$ ) with expression in their F<sub>1</sub> hybrids ( $n = 4$ ) and found extensive  
372 hybrid misexpression. More than half of genes (6,590 out of 12,769 (51.6%)) were differentially  
373 expressed in hybrids compared to parental species expression (Fig 1F). There was an

374 approximately equal number of genes showing overdominant and underdominant expression in  
375 hybrids, with 3,299 (25.83%) genes showing higher expression in hybrids relative to parental  
376 species and 3,291 (25.77%) showing lower expression in hybrids (Fig 1F, Fig 3B and D). While  
377 there was a similar number of genes showing over- and underdominance, the magnitude of  
378 differential expression was higher for genes showing underdominance (Fig. S4; Wilcoxon rank  
379 sum test,  $P < 2.2 \times 10^{-16}$ ). Of the 6,590 genes showing misexpression, 2,876 were annotated as  
380 zebrafish orthologs used for gene ontology enrichment analyses. Misexpressed genes were  
381 enriched for 210 ontologies, including embryonic cranial skeleton morphogenesis (GO:0048701;  
382 Table S5 and S6).

383

#### 384 *Hybrid misexpression is influenced by library preparation and sequencing conditions*

385 All of the 8 dpf samples were sequenced at the same facility using the same library preparation  
386 kit. However, the 17-20 dpf generalist and molluscivore samples were sequenced at a different  
387 facility than the 17-20 dpf hybrid samples and used a different library preparation kit. We took  
388 two approaches toward understanding how sequencing at different facilities and using different  
389 library kits may have affected the proportion of genes misexpressed between hybrids and  
390 parental species at 17-20 dpf.

391 First, we performed another differential expression comparison between whole-larvae  
392 hybrids collected at 8 dpf and whole-larvae parental species that we collected for a previous  
393 study between 8-10 dpf (McGirr and Martin 2018). The 8 dpf hybrids were sequenced at the  
394 same facility with the same library kit as the 17-20 dpf hybrids, while the 8-10 dpf parental  
395 species were sequenced at the same facility with the same library kit as the 17-20 dpf parental  
396 species. This design mirrored the comparison we used to estimate 17-20 dpf hybrid craniofacial  
397 misexpression, but at an earlier developmental stage (Fig. S5). Whereas comparisons between 8  
398 dpf hybrids and parental species sequenced under the same conditions revealed 370 genes (2.1%)  
399 misexpressed, comparisons between hybrids and parental species sequenced at different  
400 sequencing centers with different library preparation kits suggested that 997 (6%) genes were  
401 misexpressed – a 37% increase (Fig. S5). This presents a major caveat to our findings, but does  
402 not suggest that all genes showing hybrid misexpression in 17-20 dpf craniofacial tissues are  
403 false-positives. Using this estimate of bias to correct for different library preparation methods for

404 our 17-20 dpf samples, we estimate that 19.1% genes were misexpressed in hybrid craniofacial  
405 tissue rather than 51.6%.

406 We also investigated whether a significant amount of between-sample variance in read  
407 counts was explained by library preparation method or sequencing date. For each sample we  
408 quantified the number of normalized read counts, raw read counts, and raw fastq reads. We also  
409 estimated the proportion of duplicate reads out of total mapped reads, the median percent GC  
410 content across mapped reads, and the uniformity of coverage across mapped reads (median  
411 transcript integrity numbers (TINs)). All of these measures could be influenced by different  
412 library preparation methods (Alberti et al. 2014; Van Dijk et al. 2014; KAPA Biosystems 2016).  
413 Library preparation method was not associated with differences in the number of normalized  
414 read counts or median TINs (Fig. 4 A and B; Welch two sample t-test,  $P > 0.05$ ). When we  
415 grouped samples by sequencing date rather than library preparation method, we found that the  
416 17-20 dpf hybrid craniofacial samples (sequenced 6/17) did not show any difference in median  
417 GC content, raw read counts, or raw fastq reads compared to samples sequenced on different  
418 dates (Fig S6). However, these samples did show lower proportions of duplicate reads, fewer  
419 normalized read counts, and lower TINs compared to samples sequenced on all other dates (Fig.  
420 4C-E; ANOVA;  $P < 0.01$ ). TINs quantify the uniformity of coverage across transcripts and are  
421 informative as a measure of *in vitro* RNA degradation, which likely suggests that hybrid  
422 craniofacial samples experienced more degradation than other samples prior to sequencing.  
423 Indeed, lower TIN was significantly correlated with a lower number of normalized counts across  
424 samples (Fig. 4F; linear regression;  $P = 2.0 \times 10^{-5}$ ). Given that hybrid craniofacial samples  
425 showed lower TINs and lower normalized counts (Fig. 4C and D), we expected to see a bias  
426 toward underexpressed genes in hybrids relative to parental species. Instead, we found  
427 approximately the same number of genes overexpressed in hybrids (25.83%) as there were genes  
428 underexpressed (25.77%; Fig. 1F and 3B).

429 Overall, we found that our estimate of the proportion of genes misexpressed in 17-20 dpf  
430 hybrid craniofacial tissue (51.6%) may be biased due to differences in the number of duplicate  
431 reads produced by two different library preparation methods (Fig. 4E). We quantified this bias by  
432 measuring hybrid misexpression between samples collected at an earlier developmental stage  
433 and found that 19.1% of genes were misexpressed in 17-20 dpf hybrid craniofacial tissues after

434 correcting for library preparation biases (Fig. S5). We found that 17-20 dpf hybrid craniofacial  
435 tissues likely experienced more *in vitro* RNA degradation than other samples, but this did not  
436 produce a bias toward more genes showing underdominant expression in hybrids (Fig. 3B).

437

### 438 ***Compensatory variation underlies misexpression in hybrids***

439 A gene that is differentially expressed between parental species is expected to also show biased  
440 allelic expression at heterozygous sites in F<sub>1</sub> hybrids if expression divergence is due to *cis*-  
441 regulatory variation because both parental alleles are exposed to the same *trans*-regulatory  
442 environment (Wittkopp et al. 2004). Alternatively, a gene that is differentially expressed between  
443 parental species is not expected to show biased allelic expression in hybrids if expression  
444 divergence is due to *trans*-regulatory divergence (Wittkopp et al. 2004). If a gene shows similar  
445 gene expression levels between parental species but shows biased allelic expression only in  
446 hybrids, it may be regulated by compensatory variation, and such genes are likely to be  
447 misexpressed in hybrids (Landry et al. 2005). We identified 15,429 phased heterozygous sites  
448 across all 8 dpf and 17-20 dpf individuals with sequencing coverage  $\geq 20\times$  that fell within 2,761  
449 (8 dpf) and 1,911 (17-20 dpf) genes used for differential expression analyses. We estimated  
450 allele specific expression (ASE) for these genes and paired these data with patterns of differential  
451 expression between parental species to identify genes controlled by *cis*-regulatory elements,  
452 *trans*-regulatory factors, and *cis*  $\times$  *trans* compensatory variation (Table 2).

453 Out of the 700 genes differentially expressed between generalists and molluscivores at 8  
454 dpf, 139 contained informative heterozygous sites amenable to allele specific expression  
455 analyses. We also measured ASE across sites within 2,770 genes that showed no difference in  
456 expression between generalists and molluscivores at 8 dpf. We found more gene expression  
457 divergence between species controlled by *trans* regulation (125, 4.3%) than *cis* regulation (14,  
458 0.48%; Fig. 5A and C). The magnitude of expression divergence was weaker for genes  
459 controlled by *trans* regulation compared to *cis* regulation (Wilcoxon rank sum test,  $P < 1.6 \times 10^{-11}$ ).  
460 We found 157 genes (5.4%) that were likely regulated by compensatory mechanisms, which  
461 showed ASE only in hybrids and were not differentially expressed between generalists and  
462 molluscivores. Of these, nine genes (0.33%) also showed misexpression in hybrids (Fig. 5A and  
463 C).



464 Out of the 81 genes differentially expressed in craniofacial tissue between generalists and  
465 molluscivores at 17-20 dpf, 18 contained informative heterozygous sites amenable to allele  
466 specific expression analyses. We also measured ASE across sites within 2,387 genes that showed  
467 no difference in expression between generalists and molluscivores at 17-20 dpf. We found 10  
468 genes (0.41%) controlled by *trans* regulation and 8 genes (0.33%) controlled by *cis* regulation  
469 (Fig. 5B and D). Strikingly, we found 1080 genes (44.81%) that were likely regulated by  
470 compensatory mechanisms. In support of this wide-spread compensatory regulation, 581 of these  
471 1080 genes (53.8%) also showed misexpression in hybrids (Fig. 5B and D).

472 We found many more genes showing ASE in 17-20 dpf hybrid craniofacial tissue than  
473 any other samples (Fig. 6A; ANOVA,  $P = 2.81 \times 10^{-5}$ ). Since misexpression is expected in  
474 hybrids when gene expression is controlled by compensatory variation between parental species  
475 (Landry et al. 2005; Bedford and Hartl 2009), the high number of genes showing compensatory  
476 regulation and high number of genes showing ASE in hybrids supports the validity of extensive  
477 misexpression in 17-20 dpf hybrid craniofacial tissue. We likely overestimated the amount of  
478 misexpression in this tissue because hybrids were sequenced using a different library preparation  
479 kit than parental species (see above). However, ASE was estimated by examining allelic ratios in  
480 individual samples and should not suffer from this bias. 17-20 dpf hybrid craniofacial tissue was  
481 sequenced at the same facility using the same library preparation kit as all of the 8 dpf samples  
482 (Table 1 and S1), yet we only found a high number of genes showing ASE in the 17-20 dpf  
483 hybrids (Fig 6A).

484 We tested whether this pattern might be due to higher rates of *in vitro* degradation in  
485 hybrid samples (reflected by low TINs), which could increase variance in the abundance of reads  
486 at heterozygous sites and bias ASE estimates. Lower TIN was correlated with higher ASE (Fig.  
487 6D; linear regression;  $P = 9.04 \times 10^{-14}$ ). This correlation persisted when 17-20 dpf hybrid  
488 craniofacial samples were excluded from the model (Fig. 6E; linear regression;  $P = 0.034$ ).  
489 However, the proportion of genes showing ASE was much higher in 17-20 dpf hybrid  
490 craniofacial samples than predicted by the latter linear model. Even the lowest TIN for a 17-20  
491 dpf hybrid sample (32.68) predicted a much lower range of genes showing ASE (8.2% -14.1%)  
492 compared to the observed range (32.8% - 51.6%). We also estimated ASE again with a higher  
493 coverage threshold ( $\geq 100$  counts supporting each heterozygous allele) to reduce the chances of

494 increased variance affecting binomial tests and still found that hybrid craniofacial samples  
495 showed more ASE than other samples (Fig. 6B; ANOVA,  $P = 3.85 \times 10^{-4}$ ).

496

## 497 **Discussion**

498 Molluscivores show extreme craniofacial divergence relative to their generalist sister species,  
499 exhibiting a novel maxillary protrusion and short robust jaws (Fig 1A; Martin and Wainwright  
500 2013a; Hernandez et al. 2018). Given the extreme craniofacial divergence observed between  
501 molluscivores and their generalist sister-species, we might expect to find genes expressed in  
502 hybrids outside the range of either parent species as a result of discordance between alternatively  
503 coadapted genes in networks shaping divergent craniofacial morphologies. However, genetic  
504 divergence between generalists and molluscivores is low, with only 79 SNPs fixed between  
505 species (genome-wide average  $F_{st} = 0.08$ ,  $D_{xy} = 0.000166$  (McGirr and Martin 2017; McGirr and  
506 Martin 2018)). Despite this low genetic divergence and ongoing gene flow between species, we  
507 found misexpression in hybrids at two developmental stages and tissue types. We also measured  
508 allele specific expression (ASE) for genes expressed in hybrids and parental species and found  
509 evidence for compensatory divergence influencing hybrid misexpression at both developmental  
510 stages.

511

### 512 ***Hybrid misexpression during juvenile development***

513 While many studies on hybrid misexpression search for regulatory divergence in ‘speciation  
514 genes’ associated with sterility and inviability (Malone and Michalak 2008; Renaut et al. 2009;  
515 Davidson and Balakrishnan 2016), our results highlight the importance of considering  
516 misexpression over multiple early developmental stages and in the context of adaptive  
517 morphological traits. We found evidence of slight misexpression in 8 dpf whole-larvae hybrid  
518 tissues (2.1% of genes) and extensive misexpression in 17-20 dpf hybrid craniofacial tissues  
519 (19.1% of genes after correcting for bias due to library preparation method).

520 There are several reasons why we might expect to find a higher proportion of genes  
521 misexpressed in 17-20 dpf hybrid craniofacial tissues relative to 8 dpf whole-larvae tissues. The

522 molluscivore shows exceptional rates of morphological diversification, particularly in  
523 craniofacial traits (Martin and Wainwright 2011). Perhaps 17-20 dpf is a crucial developmental  
524 window when gene networks shaping these traits become extensively misregulated in hybrids. It  
525 is just after this stage that the relative length of the premaxilla, maxilla, palatine, and lower jaw  
526 tend to increase more for generalists than molluscivores (Lencer et al. 2016). It is also possible  
527 that regulatory changes are compounded throughout development and have cascading effects,  
528 resulting in higher rates of misexpression in later stages. Finally, some of the increased  
529 misexpression in hybrid craniofacial tissue can likely be attributed to our sampling design. We  
530 found that hybrid craniofacial samples showed lower TINs and lower normalized counts (Fig. 4A  
531 and D), suggesting that these samples may have experienced more *in vitro* RNA degradation  
532 than other samples (Wang et al. 2016). However, under this scenario, we would expect to see a  
533 bias toward lower gene expression in hybrids relative to parental species. Alternatively, we  
534 found approximately the same number of genes overexpressed in hybrids (25.83%) as there were  
535 genes underexpressed (25.77%), suggesting that many genes were overexpressed in hybrids  
536 despite potential RNA degradation.

537 We found roughly twice the amount of misexpression in hybrid craniofacial tissues  
538 compared to a study of misexpression in whole-body tissue that measured gene expression in F<sub>1</sub>  
539 hybrids generated between benthic and limnetic lake whitefish (Renaut et al. 2009). These  
540 populations also diverged within the past 10 kya and occupy different habitats within lakes  
541 (Renaut et al. 2009; Bernatchez 2004). We also found that genes showing underdominance in  
542 hybrids showed a higher magnitude of differential expression compared to those showing  
543 overdominance in 8 dpf and 17-20 dpf tissues (Fig. S4), a pattern that has also been observed in  
544 whitefish (Renaut and Bernatchez 2011) and a generalist/specialist *Drosophila* species pair  
545 (McManus et al. 2010).

546

#### 547 ***The consequences of hybrid misexpression***

548 It is unclear whether such extensive gene misexpression in hybrid craniofacial tissues might  
549 contribute to intrinsic post-zygotic isolation between generalists and molluscivores. F<sub>2</sub> hybrids  
550 exhibiting intermediate and transgressive craniofacial phenotypes showed reduced survival and  
551 growth rates in the wild relative to F<sub>2</sub> hybrids resembling parental species (Martin and

552 Wainwright 2013b; Martin 2016), but short-term experiments measuring F<sub>2</sub> hybrid survival in  
553 the lab did not find any evidence of reduced survival for hybrids with intermediate phenotypes  
554 (Martin and Wainwright 2013b). This was interpreted as evidence that complex fitness  
555 landscapes measured in field enclosures on San Salvador with multiple peaks corresponding to  
556 the generalist and molluscivore phenotypes were due to competition and foraging ability in the  
557 wild (i.e. extrinsic reproductive isolation). However, additional analyses of these data suggest  
558 that absolute performance of hybrids may also play a role in their survival. The most  
559 transgressive hybrid phenotypes exhibited the lowest fitness, contrary to expectations from  
560 negative frequency-dependent disruptive selection (Martin 2016). It is still possible that intrinsic  
561 and extrinsic incompatibilities interact such that gene misexpression weakens performance more  
562 in the wild than in the lab. However, note that F<sub>1</sub> hybrids used in this study would fall within an  
563 intermediate phenotypic position relative to parental trophic morphology whereas field  
564 experiments used F<sub>2</sub> and later generation hybrid intercrosses and backcrosses.

565

#### 566 ***Hybrid misexpression is controlled by compensatory divergence***

567 When an optimal level of gene expression is favored by stabilizing selection, compensatory  
568 variation can accumulate between species and cause misexpression in hybrids (Landry et al.  
569 2005; Bedford and Hartl 2009). We combined results from differential expression analyses with  
570 allele specific expression (ASE) results to identify mechanisms of regulatory divergence between  
571 generalists and molluscivores. In 8 dpf whole-larvae tissue, we found 4.3% of genes controlled  
572 by *trans* regulation, 0.48% controlled by *cis* regulation, and 5.4% controlled by compensatory  
573 regulation (Fig. 5B). The low amount of genes controlled by compensatory regulation was  
574 reflected by the low amount of genes misexpressed in 8 dpf hybrids. In 17-20 dpf hybrid  
575 craniofacial tissues, we found 0.41% of genes controlled by *trans* regulation, 0.33% controlled  
576 by *cis* regulation, and 44.81% controlled by compensatory regulation (Fig. 5B). The large  
577 number of genes we found controlled by compensatory regulation is consistent with the  
578 extensive misexpression observed in hybrid craniofacial tissue, and the majority of genes  
579 showing signs of compensatory regulation were also misexpressed in hybrids (53.8%). This  
580 independent line of evidence supporting misexpression in 17-20 dpf hybrid craniofacial tissue  
581 was not biased by differences in library preparation methods because allele specific expression

582 was estimated by measuring allelic ratios in individual samples. 17-20 dpf hybrid craniofacial  
583 tissue was sequenced at the same facility using the same library preparation kit as the 8 dpf  
584 samples, yet we only found a high number of genes showing ASE in the 17-20 dpf hybrids (Fig.  
585 6). These results are also in line with studies finding widespread compensatory evolution in other  
586 systems with greater divergence times between species (Landry et al. 2005, 2007; Takahasi et al.  
587 2011; Goncalves et al. 2012; Bell et al. 2013; Mack and Nachman 2017; but also see Fraser  
588 2018).

589 We did not expect to find more genes controlled by *trans* regulation than *cis* regulation at  
590 either developmental stage. Other studies untangling *cis*- and *trans*-regulatory mechanisms have  
591 found that *cis*-variants contribute more to interspecific divergence, while *trans*-variants  
592 contribute more to intraspecific divergence (Prud'homme et al. 2007; Lemos et al. 2008; Signor  
593 and Nuzhdin 2018). Importantly though, many of the studies supporting this pattern examined  
594 interspecific hybrids generated by species pairs with much greater divergence times (Graze et al.  
595 2009: *Drosophila melanogaster* and *D. simulans* diverged 2.5 mya; Tirosh et al. 2009:  
596 *Saccharomyces cerevisiae* and *S. paradoxus* diverged 5 mya; Shi et al. 2012: *Arabidopsis*  
597 *thaliana* and *A. arenosa* diverged 5.3 mya). Given that generalists and molluscivores diverged  
598 only within the past 10,000 years and are known to hybridize in the wild, perhaps we should  
599 expect to see more *trans* effects for the same reason *trans*-effects contribute more to intraspecific  
600 divergence. Namely, the larger mutational target of *trans*-regulatory factors results in the  
601 observed excess of intraspecific *trans*-effects (Wittkopp et al. 2008; Emerson et al. 2010;  
602 Suvorov et al. 2013).

603

## 604 **Conclusion**

605 We found more misexpression in F<sub>1</sub> hybrid cranial tissues relative to whole-larvae hybrid tissues  
606 sampled at an earlier developmental stage. This points to divergent evolution of developmental  
607 networks shaping novel traits in the molluscivore. It is unclear whether such rampant  
608 misexpression causes intrinsic incompatibilities in hybrids within this recent adaptive radiation.  
609 Investigating mechanisms regulating gene expression between generalists and molluscivores that  
610 result in hybrid misexpression will shed light on whether the variants shaping novel traits may  
611 also contribute to reproductive isolation. Examining misexpression across multiple early

612 developmental stages in the context of developing tissues that give rise to adaptive traits can  
613 paint a more complete picture of genetic incompatibilities that distinguish species.

614

### 615 **Data Availability**

616 All transcriptomic raw sequence reads are available as zipped fastq files on the NCBI BioProject  
617 database. Accession: PRJNA391309. Title: Craniofacial divergence in Caribbean Pupfishes.

618

### 619 **Acknowledgements**

620 This study was funded by the University of North Carolina at Chapel Hill and the Miller Institute  
621 for Basic Research in the Sciences to CHM. We thank Daniel Matute, Emilie Richards, Michelle  
622 St. John, and Sara Suzuki for valuable discussions and computational assistance; Emilie Richards  
623 for photographs of specimens in Figure 1; The Vincent J. Coates Genomics Sequencing  
624 Laboratory at the University of California, Berkeley and the High-Throughput Sequencing  
625 Facility at the University of North Carolina, Chapel Hill for performing RNA library prep and  
626 Illumina sequencing; the Gerace Research Centre for accommodation; and the Bahamian  
627 government BEST Commission for permission to conduct this research.

628

### 629 **Author Contributions**

630 JAM wrote the manuscript, extracted the RNA samples, and conducted all bioinformatic  
631 analyses. Both authors contributed to the conception and development of the ideas and revision  
632 of the manuscript.

633

### 634 **Competing interests**

635 We declare we have no competing interests.

636

637

638 **References**

- 639 Ashburner, M., C. A. Ball, J. A. Blake, D. Bolstein, H. Butler, J. M. Cherry, A. P. Davis, K.  
640 Dolinski, S. S. Dwight, J. T. Eppig, et al. 2000. Gene ontology: tool for the unification of  
641 biology. *Nat. Genet.* 25:25–29.
- 642 Alberti, A., C. Belser, S. Engelen, L. Bertrand, C. Orvain, L. Brinas, C. Cruaud, L. Giraut, C. Da  
643 Silva, C. Firmo, J. M. Aury, and P. Wincker. 2014. Comparison of library preparation  
644 methods reveals their impact on interpretation of metatranscriptomic data. *BMC Genomics*  
645 15:1–13.
- 646 Bedford, T., and D. L. Hartl. 2009. Optimization of gene expression by natural selection. *Proc.*  
647 *Natl. Acad. Sci.* 106:1133–1138.
- 648 Bell, G. D. M., N. C. Kane, L. H. Rieseberg, and K. L. Adams. 2013. RNA-seq analysis of  
649 allele-specific expression, hybrid effects, and regulatory divergence in hybrids compared  
650 with their parents from natural populations. *Genome Biol. Evol.* 5:1309–1323.
- 651 Benjamini, Y., Hochberg, Y. 2017. Controlling the False Discovery Rate : A Practical and  
652 Powerful Approach to Multiple Testing. *J. R. Statis. Soc. B.* 57:289–300.
- 653 Biosystems, K. 2014. Technical Data Sheet KAPA Stranded mRNA-Seq Kit. 1–16.
- 654 Carroll, S. B. 2008. Perspective Evo-Devo and an Expanding Evolutionary Synthesis : A Genetic  
655 Theory of Morphological Evolution. *Cell.* 134:25–36.
- 656 Coolon, J. D., C. J. Mcmanus, K. R. Stevenson, J. D. Coolon, C. J. Mcmanus, K. R. Stevenson,  
657 B. R. Graveley, and P. J. Wittkopp. 2014. Tempo and mode of regulatory evolution in  
658 *Drosophila* Tempo and mode of regulatory evolution in *Drosophila*. *Genome Res.* 25:797–  
659 808.
- 660 Cowles, C. R., J. N. Hirschhorn, D. Altshuler, and E. S. Lander. 2002. Detection of regulatory  
661 variation in mouse genes. *Nat. Genet.* 32:432–437.
- 662 Coyne, J. A. & O. 2004. *Speciation*. Sunderland, MA Sinauer Assoc.
- 663 Davidson, J. H., and C. N. Balakrishnan. 2016. Gene Regulatory Evolution During Speciation in  
664 a Songbird. *G3.* 6:1357–1364.

- 665 Denver, D. R., K. Morris, J. T. Streelman, S. K. Kim, M. Lynch, and W. K. Thomas. 2005. The  
666 transcriptional consequences of mutation and natural selection in *Caenorhabditis elegans*.  
667 *Nat. Genet.* 37:544-8.
- 668 DePristo, M. A., E. Banks, R. Poplin, K. V Garimella, J. R. Maguire, C. Hartl, A. A. Philippakis,  
669 G. del Angel, M. A. Rivas, M. Hanna, A. McKenna, T. J. Fennell, A. M. Kernysky, A. Y.  
670 Sivachenko, K. Cibulskis, S. B. Gabriel, D. Altshuler, and M. J. Daly. 2011. A framework  
671 for variation discovery and genotyping using next-generation DNA sequencing data. *Nat.*  
672 *Genet.* 43:491–8.
- 673 Dobin, A., C. A. Davis, F. Schlesinger, J. Drenkow, C. Zaleski, S. Jha, P. Batut, M. Chaisson,  
674 and T. R. Gingeras. 2013. STAR: ultrafast universal RNA-seq aligner. *Bioinformatics.*  
675 29:15–21.
- 676 Emerson, J. J., L. C. Hsieh, H. M. Sung, T. Y. Wang, C. J. Huang, H. H. S. Lu, M. Y. J. Lu, S.  
677 H. Wu, and W. H. Li. 2010. Natural selection on cis and trans regulation in yeasts. *Genome*  
678 *Res.* 20:826–836.
- 679 Ewels, P., S. Lundin, and K. Max. 2016. Data and text mining MultiQC : summarize analysis  
680 results for multiple tools and samples in a single report. *Bioinformatics.* 32:3047–3048.
- 681 Fang, S., R. Yukilevich, Y. Chen, D. A. Turissini, K. Zeng, I. A. Boussy, and C. I. Wu. 2012.  
682 Incompatibility and competitive exclusion of genomic segments between sibling *Drosophila*  
683 species. *PLoS Genet.* 8.
- 684 Fraser, H. B. 2018. Improving Estimates of Compensatory cis–trans Regulatory Divergence.  
685 *Trends. Genet.*
- 686 Goncalves, A., S. Leigh-Brown, D. Thybert, K. Stefflova, E. Turro, P. Flicek, A. Brazma, D. T.  
687 Odom, and J. C. Marioni. 2012. Extensive compensatory *cis-trans* regulation in the  
688 evolution of mouse gene expression. *Genome Res.* 22:2376–2384.
- 689 Graze, R. M., L. M. McIntyre, B. J. Main, M. L. Wayne, and S. V. Nuzhdin. 2009. Regulatory  
690 divergence in *Drosophila melanogaster* and *D. simulans*, a genomewide analysis of allele-  
691 specific expression. *Genetics* 183:547–561.
- 692 Haerty, W., and R. S. Singh. 2006. Gene regulation divergence is a major contributor to the



- 693 evolution of Dobzhansky-Muller incompatibilities between species of *Drosophila*. *Mol.*  
694 *Biol. Evol.* 23:1707–1714.
- 695 Hernandez, L. P., D. Adriaens, C. H. Martin, P. C. Wainwright, B. Masschaele, and M. Dierick.  
696 2018. Building trophic specializations that result in substantial niche partitioning within a  
697 young adaptive radiation. *J. Anat.* 232:173–185.
- 698 Hodgins-Davis, A., D. P. Rice, J. P. Townsend, and J. Novembre. 2015. Gene expression evolves  
699 under a house-of-cards model of stabilizing selection. *Mol. Biol. Evol.* 32:2130–2140.
- 700 Holtmeier, C. L. 2001. Heterochrony, maternal effects, and phenotypic variation among  
701 sympatric pupfishes. *Evolution.* 55:330–338.
- 702 Hughes, K. A., J. F. Ayroles, M. M. Reedy, J. M. Drnevich, K. C. Rowe, E. A. Ruedi, C. E.  
703 Cáceres, and K. N. Paige. 2006. Segregating variation in the transcriptome: Cis regulation  
704 and additivity of effects. *Genetics* 173:1347–1355.
- 705 Indjeian, V. B., G. A. Kingman, F. C. Jones, C. A. Guenther, J. Grimwood, J. Schmutz, R. M.  
706 Myers, and D. M. Kingsley. 2016. Evolving New Skeletal Traits by cis-Regulatory Changes  
707 in Bone Morphogenetic Proteins. *Cell* 164:45–56.
- 708 Landry, C. R., D. L. Hartl, and J. M. Ranz. 2007. Genome clashes in hybrids: Insights from gene  
709 expression. *Heredity.* 99:483–493.
- 710 Landry, C. R., P. J. Wittkopp, C. H. Taubes, J. M. Ranz, A. G. Clark, and D. L. Hartl. 2005.  
711 Compensatory cis-trans evolution and the dysregulation of gene expression in interspecific  
712 hybrids of *drosophila*. *Genetics* 171:1813–1822.
- 713 Lemos, B., L. O. Araripe, P. Fontanillas, and D. L. Hartl. 2008. Dominance and the evolutionary  
714 accumulation of cis- and trans-effects on gene expression. *Proc. Natl. Acad. Sci.*  
715 105:14471–14476.
- 716 Lencer, E. S., M. L. Riccio, and A. R. McCune. 2016. Changes in growth rates of oral jaw  
717 elements produce evolutionary novelty in bahamian pupfish. *J. Morphol.* 277:935–947.
- 718 Lencer, E. S., W. C. Warren, R. Harrison, and A. R. Mccune. 2017. The *Cyprinodon variegatus*  
719 genome reveals gene expression changes underlying differences in skull morphology among

- 720 closely related species. *BMC Genomics*. 18:424
- 721 Liao, Y., G. K. Smyth, and W. Shi. 2014. Sequence analysis featureCounts : an efficient general  
722 purpose program for assigning sequence reads to genomic features. 30:923–930.
- 723 Mack, K. L., and M. W. Nachman. 2017. Gene Regulation and Speciation. *Trends Genet*. 33:68–  
724 80.
- 725 Malone, J. H., and P. Michalak. 2008. Gene expression analysis of the ovary of hybrid females  
726 of *Xenopus laevis* and *X. muelleri*. *BMC Evol. Biol*. 8:82.
- 727 Marsden, C. D., Y. Lee, K. Kreppel, A. Weakley, A. Cornel, H. M. Ferguson, E. Eskin, and G.  
728 C. Lanzaro. 2014. Diversity, differentiation, and linkage disequilibrium: prospects for  
729 association mapping in the malaria vector *Anopheles arabiensis*. *G3*. 4:121–31.
- 730 Martin, C. H. 2016. Context-dependence in complex adaptive landscapes : frequency and trait-  
731 dependent selection surfaces within an adaptive radiation of Caribbean pupfishes.  
732 *Evolution*. 70:1265-72.
- 733 Martin, C. H., and L. C. Feinstein. 2014. Novel trophic niches drive variable progress towards  
734 ecological speciation within an adaptive radiation of pupfishes. *Mol. Ecol*. 23:1846–1862.
- 735 Martin, C. H., and P. C. Wainwright. 2013a. A remarkable species flock of *Cyprinodon*  
736 pupfishes endemic to San Salvador Island, Bahamas. *Bull. Peabody Museum Nat. Hist*.  
737 54:231–241.
- 738 Martin, C. H., and P. C. Wainwright. 2013b. Multiple fitness peaks on the adaptive landscape  
739 drive adaptive radiation in the wild. *Science* 339:208–11.
- 740 Martin, C. H., and P. C. Wainwright. 2013c. On the measurement of ecological novelty: scale-  
741 eating pupfish are separated by 168 my from other scale-eating fishes. *PLoS One* 8:e71164.
- 742 Martin, C. H., and P. C. Wainwright. 2011. Trophic novelty is linked to exceptional rates of  
743 morphological diversification in two adaptive radiations of *Cyprinodon* pupfish. *Evolution*  
744 65:2197–212.
- 745 Mcgirr, J. A., and C. H. Martin. 2016. Novel Candidate Genes Underlying Extreme Trophic  
746 Specialization in Caribbean Pupfishes. 34:873–888.

- 747 McGirr, J. A., and C. H. Martin. 2018. Parallel evolution of gene expression between trophic  
748 specialists despite divergent genotypes and morphologies. *Evol. Lett.* 2:62–75.
- 749 McGirr, J. A. and C. H. Martin. 2017. Novel candidate genes underlying extreme trophic  
750 specialization in caribbean pupfishes. *Mol. Biol. Evol.* 34:873-888.
- 751 McManus, C. J., J. D. Coolon, M. O. Duff, J. Eipper-Mains, B. R. Graveley, and P. J. Wittkopp.  
752 2010. Regulatory divergence in *Drosophila* revealed by mRNA-seq. *Genome Res.* 20:816–  
753 825.
- 754 Michalak, P., and M. A. F. Noor. 2004. Association of misexpression with sterility in hybrids of  
755 *Drosophila simulans* and *D. mauritiana*. *J. Mol. Evol.* 59:277–282.
- 756 Myroie, J.E, Hagey, F. M. 1995. Terrestrial and Shallow Marine Geology of the Bahamas and  
757 Bermuda. Geological Society of America, Boulder, CO.
- 758 Ortíz-Barrientos, D., B. A. Counterman, and M. A. F. Noor. 2007. Gene expression divergence  
759 and the origin of hybrid dysfunctions. *Genetica* 129:71–81.
- 760 Presgraves, D. C. 2003. A fine-scale genetic analysis of hybrid incompatibilities in *Drosophila*.  
761 *Genetics* 163:955–972.
- 762 Prud'homme, B., N. Gompel, and S. B. Carroll. 2007. Emerging principles of regulatory  
763 evolution. *Proc. Natl. Acad. Sci.* 104:8605–8612.
- 764 Ranz, J. M., K. Namgyal, G. Gibson, D. L. Hartl, J. M. Ranz, K. Namgyal, G. Gibson, and D. L.  
765 Hartl. 2004. Anomalies in the Expression Profile of Interspecific Hybrids of *Drosophila*  
766 *melanogaster* and *Drosophila simulans* Anomalies in the Expression Profile of Interspecific  
767 Hybrids of *Drosophila melanogaster* and *Drosophila simulans*. *Genome Res.* 14:373–379.
- 768 Renaut, S., and L. Bernatchez. 2011. Transcriptome-wide signature of hybrid breakdown  
769 associated with intrinsic reproductive isolation in lake whitefish species pairs (*Coregonus*  
770 spp. Salmonidae). *Heredity.* 106:1003–1011.
- 771 Renaut, S., A. W. Nolte, and L. Bernatchez. 2009. Gene expression divergence and hybrid  
772 misexpression between lake whitefish species pairs (*Coregonus* spp. Salmonidae). *Mol.*  
773 *Biol. Evol.* 26:925–936.

- 774 Roberge, C., É. Normandeau, S. Einum, H. Guderley, and L. Bernatchez. 2008. Genetic  
775 consequences of interbreeding between farmed and wild Atlantic salmon: Insights from the  
776 transcriptome. *Mol. Ecol.* 17:314–324.
- 777 Rockman, M. V., and L. Kruglyak. 2006. Genetics of global gene expression. *Nat. Rev. Genet.*  
778 7:862–872.
- 779 Rottscheldt, R., and B. Harr. 2007. Extensive additivity of gene expression differentiates  
780 subspecies of the house mouse. *Genetics* 177:1553–1567.
- 781 Schumer, M., R. Cui, D. L. Powell, R. Dresner, G. G. Rosenthal, and P. Andolfatto. 2014. High-  
782 resolution mapping reveals hundreds of genetic incompatibilities in hybridizing fish species.  
783 *Elife* 2014:1–21.
- 784 Shi, X., D. W. K. Ng, C. Zhang, L. Comai, W. Ye, and Z. Jeffrey Chen. 2012. Cis- and trans-  
785 regulatory divergence between progenitor species determines gene-expression novelty in  
786 *Arabidopsis* allopolyploids. *Nat. Commun.* 3:950–959.
- 787 Signor, S. A., and S. V. Nuzhdin. 2018. The Evolution of Gene Expression in cis and trans.  
788 *Trends Genet.* 7:532-544.
- 789 Suvorov, A., V. Nolte, R. V. Pandey, S. U. Franssen, A. Futschik, and C. Schlötterer. 2013.  
790 Intra-specific regulatory variation in *Drosophila pseudoobscura*. *PLoS One* 8.
- 791 Sweigart, A. L., L. Fishman, and J. H. Willis. 2006. A simple genetic incompatibility causes  
792 hybrid male sterility in *mimulus*. *Genetics* 172:2465–2479.
- 793 Takahasi, K. R., T. Matsuo, and T. Takano-Shimizu-Kouno. 2011. Two types of cis-trans  
794 compensation in the evolution of transcriptional regulation. *Proc. Natl. Acad. Sci.*  
795 108:15276–15281.
- 796 Tirosh, I., S. Reikhav, A. A. Levy, and N. Barkai. 2009. A yeast hybrid provides insight into the  
797 evolution of gene expression regulation. *Science* 324:659–662.
- 798 Turner, B. J., D. D. Duvernell, T. M. Bunt, and M. G. Barton. 2008. Reproductive isolation  
799 among endemic pupfishes (*Cyprinodon*) on San Salvador Island, Bahamas: Microsatellite  
800 evidence. *Biol. J. Linn. Soc.* 95:566–582.

- 801 Van Dijk, E. L., Y. Jaszczyszyn, and C. Thermes. 2014. Library preparation methods for next-  
802 generation sequencing: Tone down the bias. *Exp. Cell Res.* 322:12–20.
- 803 Wainwright, P. C., and B. A. Richard. 1995. Predicting patterns of prey use from morphology of  
804 fishes. *Environ. Biol. Fishes* 44:97–113.
- 805 Wang, L., J. Nie, H. Sicotte, Y. Li, J. E. Eckel-Passow, S. Dasari, P. T. Vedell, P. Barman, L.  
806 Wang, R. Weinshiboum, J. Jen, H. Huang, M. Kohli, and J. P. A. Kocher. 2016. Measure  
807 transcript integrity using RNA-seq data. *BMC Bioinformatics* 17:1–16.
- 808 Wang, L., S. Wang, and W. Li. 2012. RSeQC: quality control of RNA-seq experiments.  
809 *Bioinformatics.* 28:2184-5.
- 810 West, R. J. D., and A. Kodric-Brown. 2015. Mate Choice by Both Sexes Maintains Reproductive  
811 Isolation in a Species Flock of Pupfish (*Cyprinodon* spp) in the Bahamas. *Ethology*  
812 121:793–800.
- 813 Wittkopp, P. J., B. K. Haerum, and A. G. Clark. 2004. Evolutionary changes in cis and trans  
814 gene regulation. *Nature* 430:85-88.
- 815 Wittkopp, P. J., B. K. Haerum, and A. G. Clark. 2008. Regulatory changes underlying expression  
816 differences within and between *Drosophila* species. *Nat. Genet.* 40:346–350.
- 817 Wolf, J. B. W., J. Lindell, and N. Backstrom. 2010. Speciation genetics: current status and  
818 evolving approaches. *Philos. Trans. R. Soc. B Biol. Sci.* 365:1717–1733.
- 819
- 820
- 821
- 822
- 823
- 824
- 825

826

827 **Table 1.** Sampling design for mRNA sequencing. Parental fishes crossed to produce larvae for  
 828 sequencing were either wild-caught ( $F_0$ ) or lab-raised over  $n$  generations (indicated by  $F_n$ ).

| mothers             | fathers             | offspring sampled | lake population | sequencing round | stage (dpf) |
|---------------------|---------------------|-------------------|-----------------|------------------|-------------|
| $F_0$ generalist    | $F_0$ molluscivore  | 3 hybrids         | osprey lake     | 4                | 8           |
| $F_0$ generalists   | $F_0$ generalists   | 3 generalists     | osprey lake     | 3                | 8           |
| $F_0$ molluscivores | $F_0$ molluscivores | 3 molluscivores   | osprey lake     | 3                | 8           |
| $F_0$ generalists   | $F_0$ generalists   | 3 generalists     | crescent pond   | 3                | 8           |
| $F_0$ molluscivores | $F_0$ molluscivores | 3 molluscivore    | crescent pond   | 4                | 8           |
| $F_1$ generalists   | $F_1$ generalists   | 3 generalists     | little lake     | 1                | 8-10        |
| $F_2$ molluscivores | $F_2$ molluscivores | 3 molluscivores   | little lake     | 1                | 8-10        |
| $F_2$ generalists   | $F_2$ generalists   | 3 generalists     | crescent pond   | 1                | 8-10        |
| $F_2$ molluscivores | $F_2$ molluscivores | 3 molluscivores   | crescent pond   | 1                | 8-10        |
| $F_2$ generalist    | $F_3$ molluscivore  | 4 hybrids         | little lake     | 2                | 17-20       |
| $F_1$ generalists   | $F_1$ generalists   | 3 generalists     | little lake     | 1                | 17-20       |
| $F_2$ molluscivores | $F_2$ molluscivores | 3 molluscivores   | little lake     | 1                | 17-20       |
| $F_2$ generalists   | $F_2$ generalists   | 3 generalists     | crescent pond   | 1                | 17-20       |
| $F_2$ molluscivores | $F_2$ molluscivores | 3 molluscivores   | crescent pond   | 1                | 17-20       |

829 **Table 2.** Classification of regulatory mechanisms underlying a gene's expression pattern in  
830 hybrids and parental species. 'Yes' or 'no' indicates a significant or non-significant statistical  
831 test outlined in the methods (DE = differentially expressed, ASE = allele specific expression).

| regulatory<br>mechanism | DE between<br>parental species | ASE in<br>hybrids only |
|-------------------------|--------------------------------|------------------------|
| <i>cis</i>              | yes                            | yes                    |
| <i>trans</i>            | yes                            | no                     |
| compensatory            | no                             | yes                    |
| conserved               | no                             | no                     |

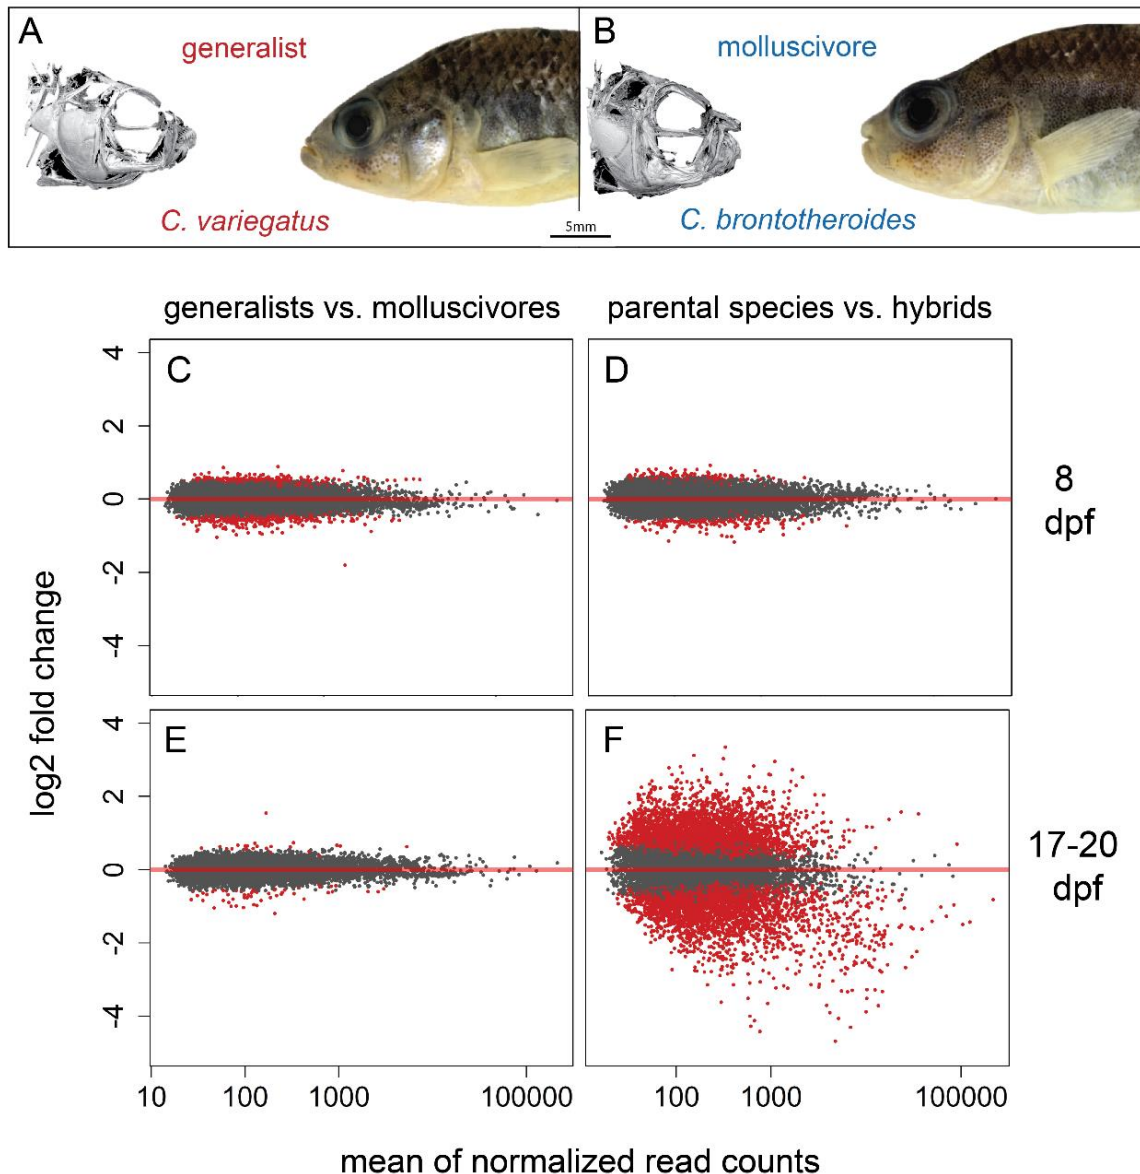

832 **Fig 1. Extensive misexpression in F<sub>1</sub> hybrid craniofacial tissues.** A) *Cyprinodon variegatus* –  
833 the generalist. B) *C. brontotheroides* – the molluscivore (μCT scans of the cranial skeleton of  
834 each species modified from Hernandez et al. 2018). Variation in gene expression between  
835 generalists vs. molluscivores at 8 dpf, D) parental species vs. hybrids at 8 dpf, E) generalists vs.  
836 molluscivores at 17-20 dpf, and F) parental species vs. hybrids at 17-20 dpf. Red points indicate  
837 genes detected as differentially expressed at 5% false discovery rate with Benjamini-Hochberg  
838 multiple testing adjustment. Grey points indicate genes showing no significant difference in  
839 expression between groups. Red line indicates a log<sub>2</sub> fold change of zero between groups. Points  
840 above/below the line are upregulated/downregulated in molluscivores relative to generalists (C  
841 and E) or hybrids relative to parental species (D and F).



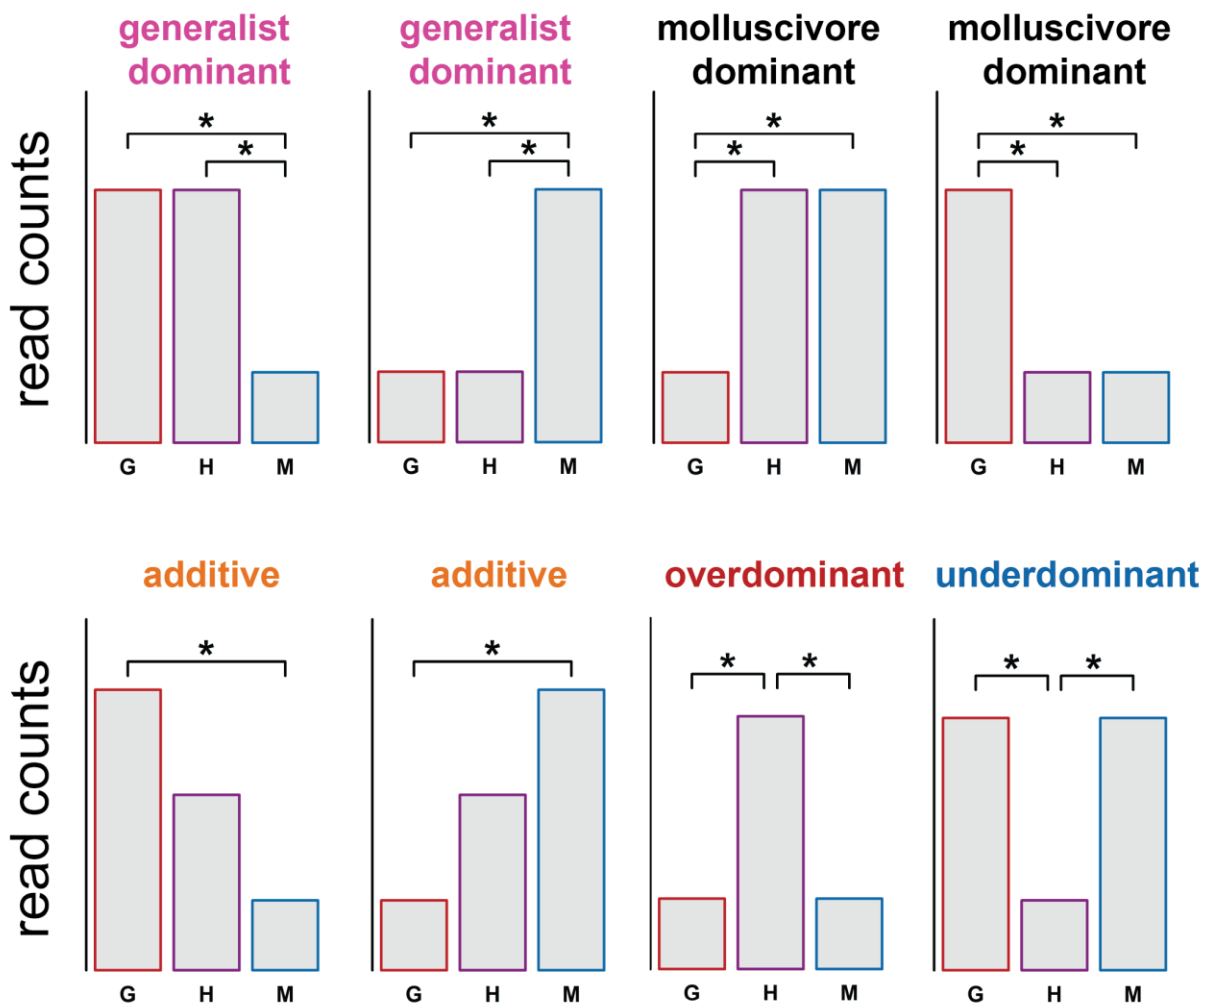

842 **Fig 2. Classifying gene expression inheritance in hybrids.** Schematic showing how gene  
843 expression inheritance in hybrids was classified. Asterisks indicate significant differential  
844 expression between groups. G = generalists, H = hybrids, M = molluscivores.

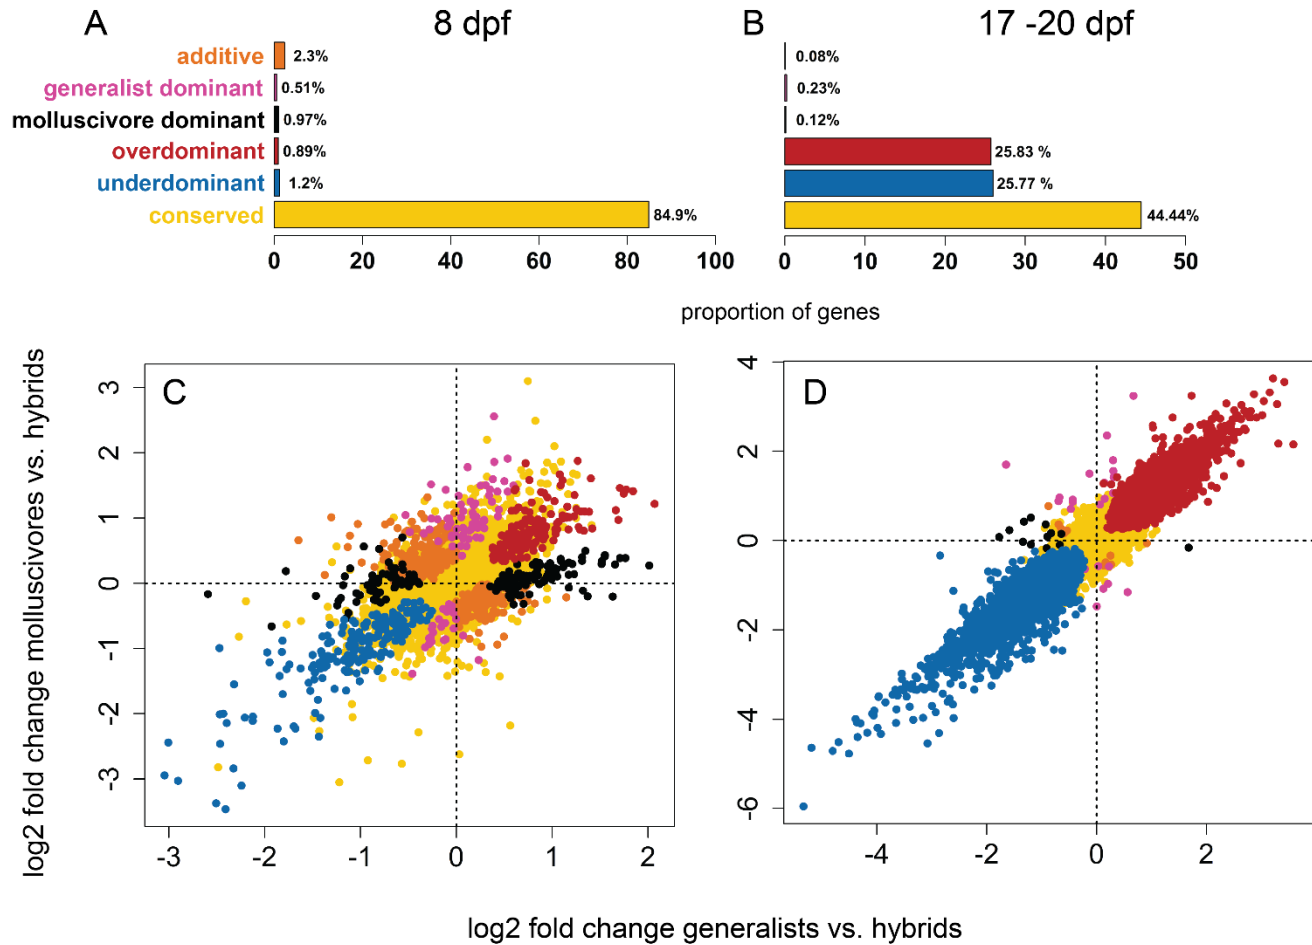

845 **Fig 3. Gene expression inheritance in hybrids.** The proportion of A) 17,705 and B) 12,769  
846 genes showing each class of hybrid gene expression in inheritance. Log<sub>2</sub> fold changes in gene  
847 expression between molluscivores vs. hybrids on the y-axis and between generalists vs. hybrids  
848 on the x-axis for C) 8 dpf whole-larvae samples and D) 17-20 dpf craniofacial samples.

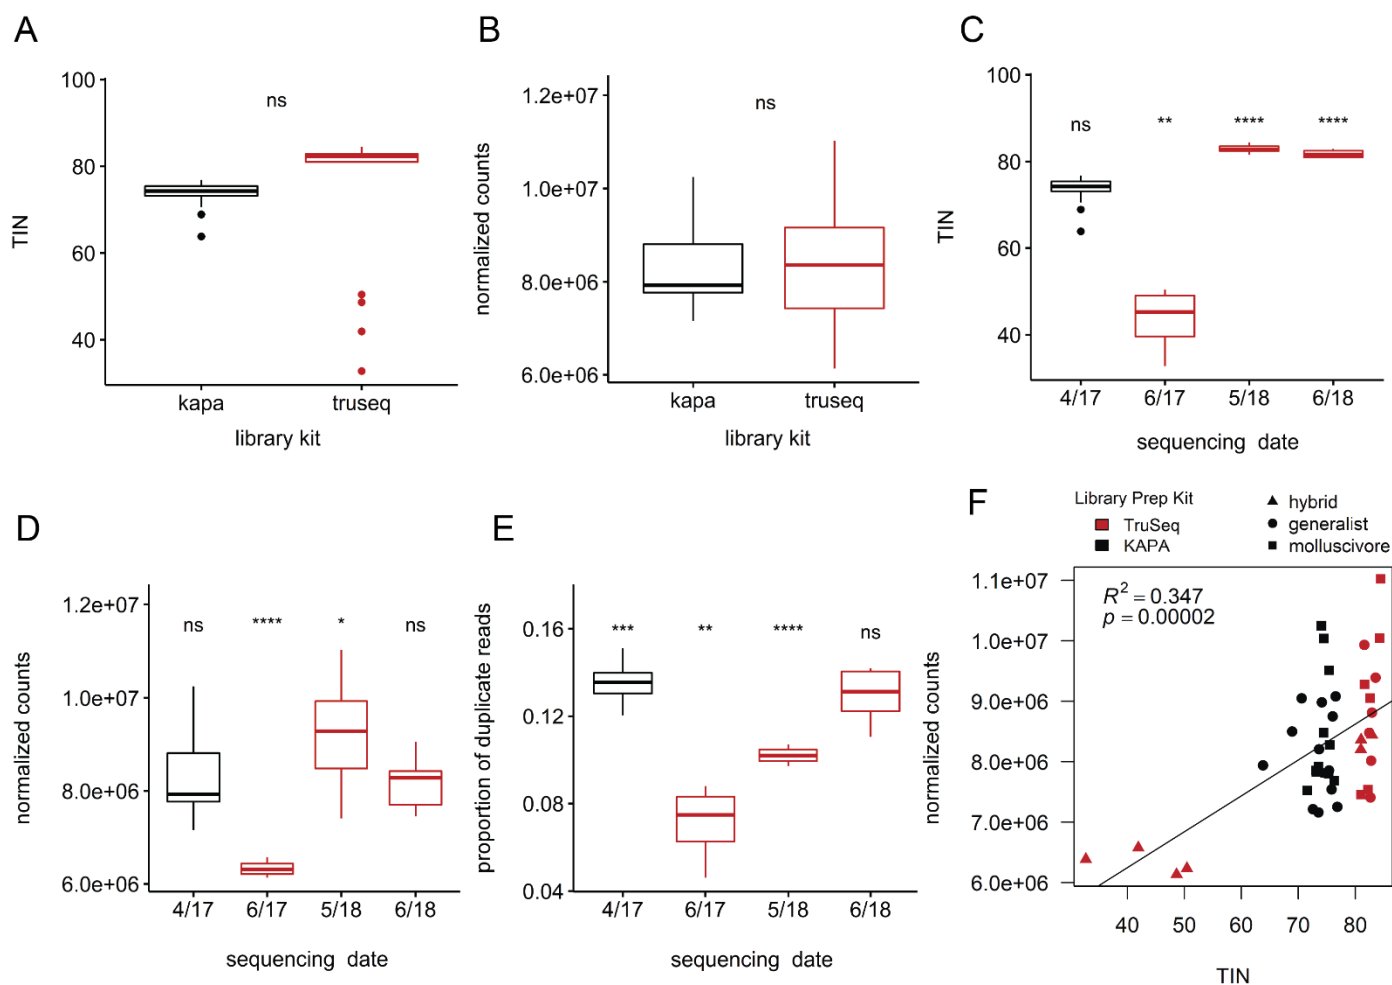

849 **Fig 4. Effects of sequencing facility and library preparation kit.** Boxplots show samples  
 850 grouped by library preparation method (A and B) or by the date they were sequenced (C-E) and  
 851 whether samples were prepared using Truseq stranded mRNA library kits (red) or KAPA  
 852 stranded mRNA library kits (black). There was no difference in A) median transcript integrity  
 853 numbers (TIN) or B) number of normalized counts between groups prepared with different  
 854 library kits (Welch two sample t-test,  $P > 0.05$ ). 17-20 dpf hybrid craniofacial samples  
 855 (sequenced 6/17) showed significantly lower C) TIN, D) normalized read counts, and D)  
 856 proportion of duplicate reads compared to samples sequenced on other dates (ANOVA;  $P <$   
 857  $0.0001 = ****$ ,  $*** = 0.001$ ,  $** = 0.01$ ,  $* = 0.05$ ). F) Lower TIN was correlated with lower  
 858 normalized read count.

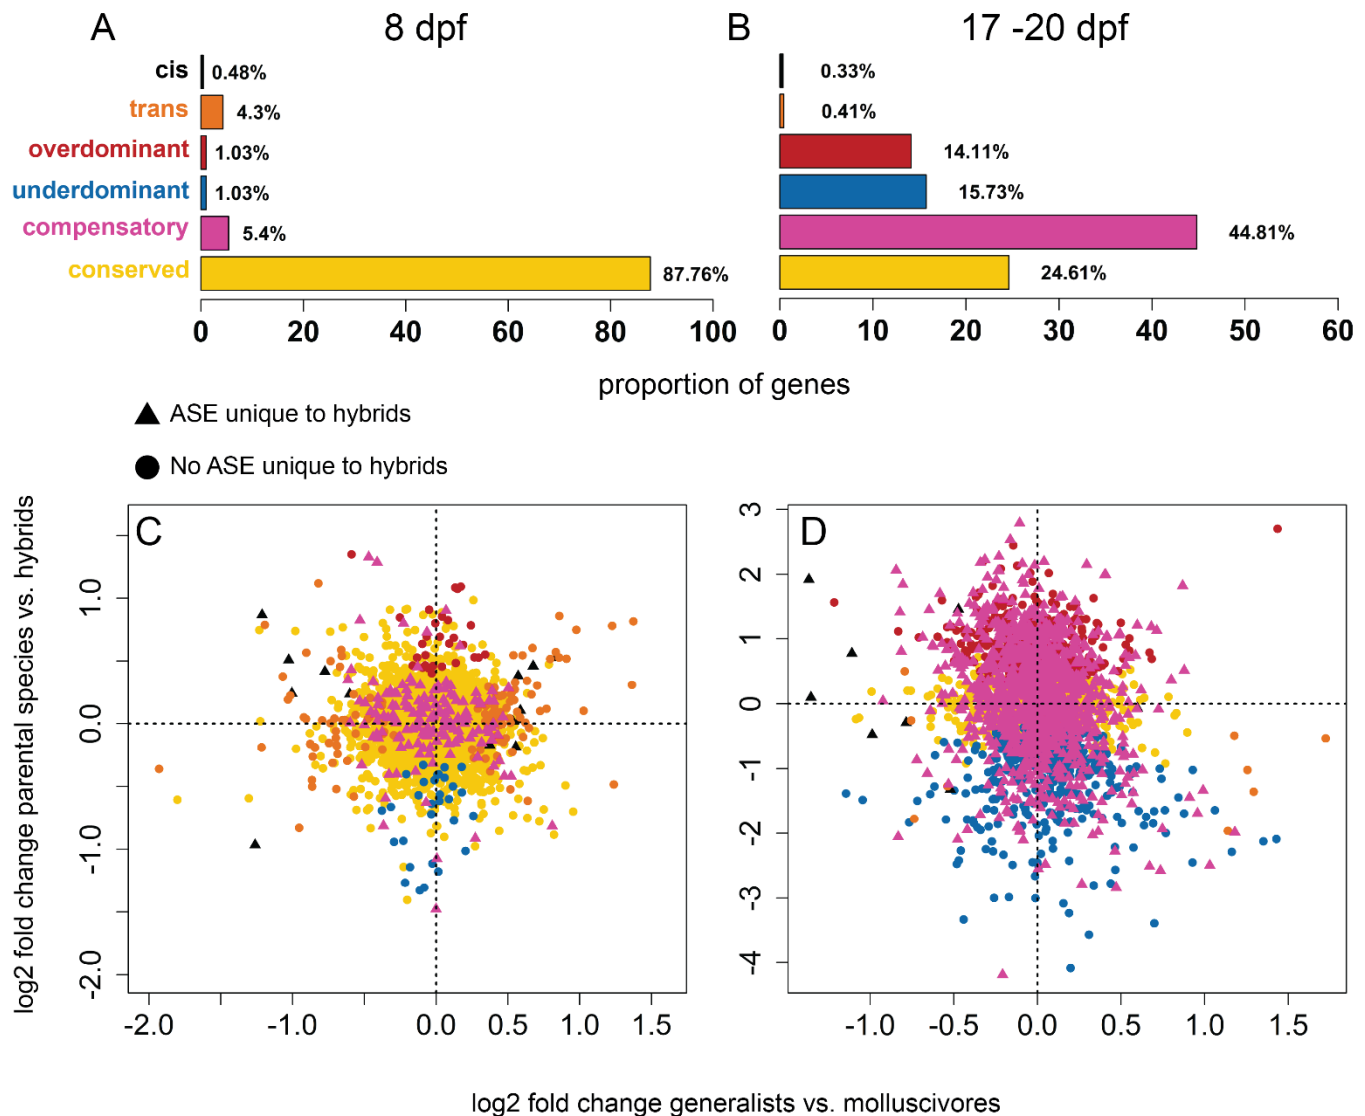

859 **Fig 5. Regulatory mechanisms of expression divergence between generalists and**  
 860 **molluscivores.** The proportion of genes showing each class of regulatory mechanism across A)  
 861 2,909 and B) 2,403 genes containing phased heterozygous sites used for allele specific  
 862 expression (ASE) analyses. Log<sub>2</sub> fold changes in gene expression between parental species vs.  
 863 hybrids on the y-axis and between generalists vs. molluscivores on the x-axis for C) 8 dpf whole-  
 864 larvae samples and D) 17-20 dpf craniofacial samples. Triangle points indicate genes showing  
 865 significant ASE in all hybrids that did not show ASE in generalists or molluscivores. We found  
 866 many more genes showing ASE and misexpression in hybrids at 17-20 dpf compared to 8 dpf  
 867 whole-larvae hybrids.

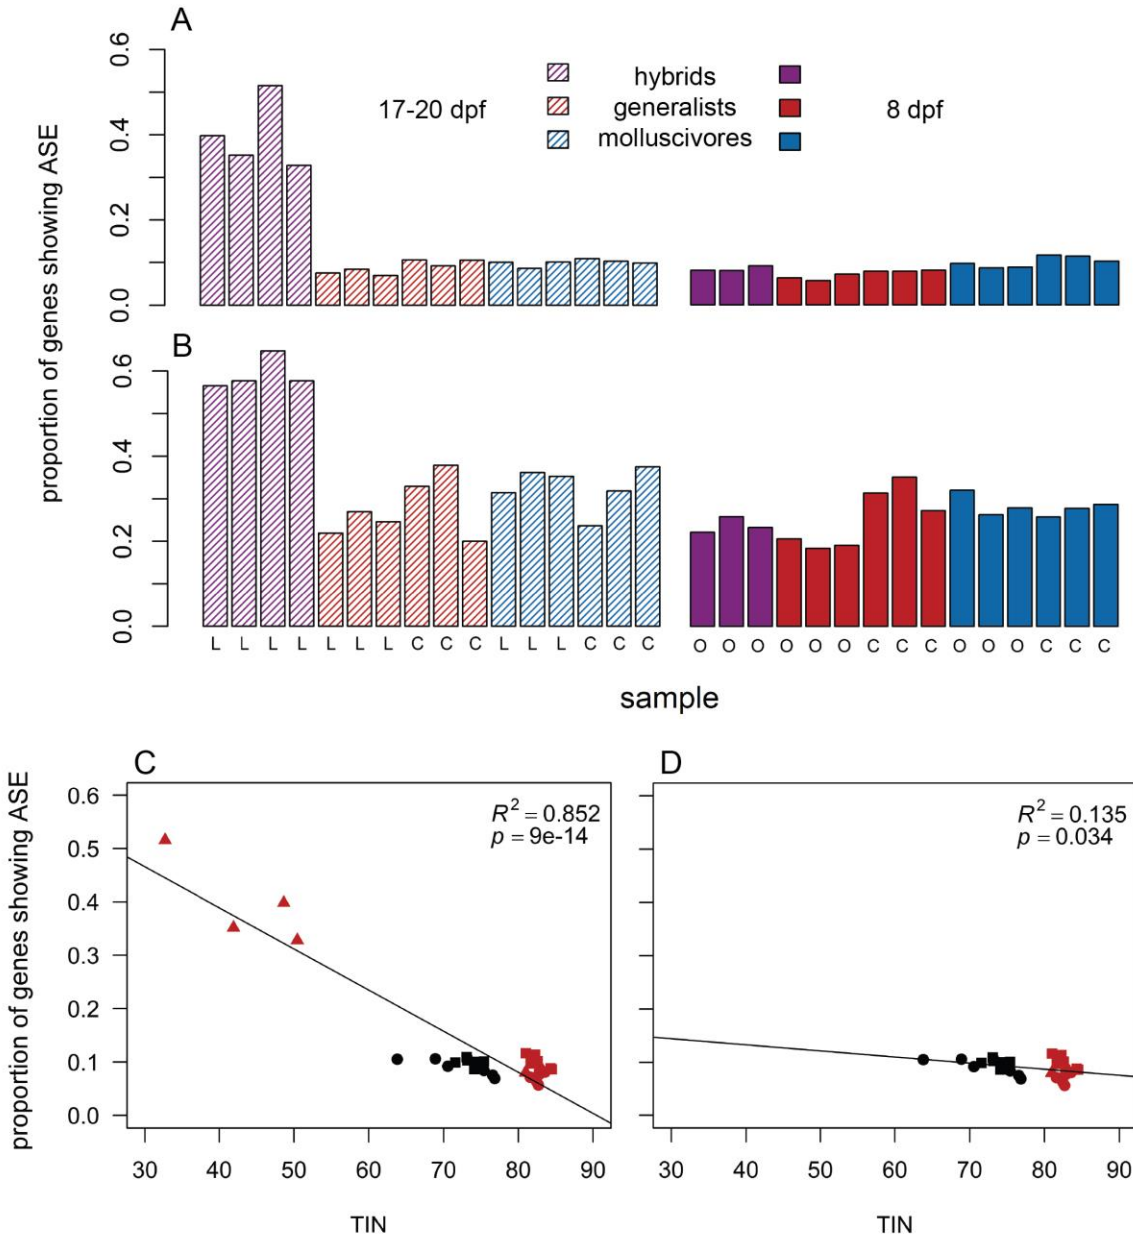

868 **Fig 6. Hybrid craniofacial tissues show high levels of allele specific expression.** 17-20 dpf  
 869 hybrid craniofacial samples (striped purple bars) showed a higher proportion of genes showing  
 870 significant allele specific expression compared to all other samples using a coverage threshold of  
 871 A)  $\geq 10\times$  reads supporting each heterozygous allele (ANOVA,  $P = 2.81 \times 10^{-5}$ ) and B)  $\geq 100\times$   
 872 reads supporting each allele (ANOVA,  $P = 3.85 \times 10^{-4}$ ). 8 dpf = solid, 17-20 dpf = striped;  
 873 hybrids = purple, generalists = red, molluscivores = blue; L = Little Lake, C = Crescent Pond, O  
 874 = Osprey Lake. C) TIN was significantly negatively correlated with ASE (linear regression;  $P =$   
 875  $9.04 \times 10^{-14}$ ). D) This correlation persisted when 17-20 dpf hybrid craniofacial samples were  
 876 excluded from the linear model (linear regression;  $P = 0.034$ ). However, the observed proportion  
 877 of genes showing ASE was much higher in 17-20 dpf hybrid craniofacial samples than predicted  
 878 by the linear model in D.
